# Supplementary material for: Development of a Novel Hematological Malignancy Specific Patient-Reported Outcome Measure (HM-PRO): Content Validity
Source: PubMed Central journal article supplement (PMC7066982; doi:10.3389/fphar.2020.00209), 2020-03-05
Supplement: Data_Sheet_1.pdf [file Data_Sheet_1.pdf]

## Appendix I

| No            | First draft of HM-PRO used for Initial testing pre-CVM                                           | Second draft of HM-PRO used for final testing post-CVM                            |
|---------------|--------------------------------------------------------------------------------------------------|-----------------------------------------------------------------------------------|
| <b>PART A</b> |                                                                                                  |                                                                                   |
| 1             | I am worried about biopsy                                                                        | I am worried about biopsy/bone marrow test.                                       |
| 2             | Transfusions are burden for me                                                                   | Transfusions are a burden for me (e.g. blood, platelets).                         |
| 3             | I worry about my appearance                                                                      | I worry about my appearance.                                                      |
| 4             | I feel distressed                                                                                | I feel distressed.                                                                |
| 5             | I worry about money matters                                                                      | I worry about money matters.                                                      |
| 6             | I have difficulty travelling                                                                     | I have difficulty travelling (e.g. bus, train, flight and car).                   |
| 7             | I have difficulty going on holidays                                                              | I have difficulty going on holidays.                                              |
| 8             | I have difficulty walking                                                                        | I have difficulty with walking.                                                   |
| 9             | I have difficulty with self-care (e.g. dressing, bathing, etc.)                                  | I have difficulty with self-care (e.g. dressing, bathing, etc.).                  |
| 10            | I have difficulty doing sports                                                                   | I have difficulty with physical activity/sports.                                  |
| 11            | I feel anxious                                                                                   | I feel anxious.                                                                   |
| 12            | I worry about dying                                                                              | I worry about dying.                                                              |
| 13            | I worry about treatment                                                                          | I worry about treatment.                                                          |
| 14            | I have difficulty with personal relationships                                                    | I am having difficulty with personal relationships.                               |
| 15            | I worry about being burden to others                                                             | I worry about being a burden to others.                                           |
| 16            | I am unable to socialize                                                                         | I have difficulty socializing.                                                    |
| 17            | I have difficulty leaving the house                                                              | I have difficulty leaving the house.                                              |
| 18            | I have difficulty with my work (or studies)                                                      | I have difficulty with work (or studies).                                         |
| 19            | I have trouble with my appetite                                                                  | I have trouble with my appetite.                                                  |
| 20            | I have difficulty managing my medication                                                         | I have difficulty managing my medication.                                         |
| 21            | I have difficulty pursuing recreational activities and pastimes (e.g. gardening, art-work, etc.) | I have difficulty pursuing hobbies and pastime. (e.g. gardening, art-work, etc.). |
| 22            | I am worried about not having children                                                           | I am worried about not being able to have children.                               |
| 23            | My sleeping pattern has changed                                                                  | My sleeping pattern has changed.                                                  |

|               |                                                            |                                                             |
|---------------|------------------------------------------------------------|-------------------------------------------------------------|
| 24            | I don't feel confident                                     | I don't feel confident.                                     |
| 25            | I have difficulty doing daily activities                   | I have difficulty doing daily activities.                   |
| 26            | My eating habits have changed                              | My eating habits have changed.                              |
| 27            | My drinking habits have changed                            | My drinking habits have changed.                            |
| 28            | I am satisfied with the healthcare services                | I am satisfied with the healthcare services.                |
| 29            | I have problems with my sex life                           | I have problems with my sex life.                           |
| 30            | I am troubled with time spent in hospital                  | I dislike the time I spend in hospital.                     |
| 31            | I am worried about my future health                        | I am worried about my future health.                        |
| 32            | I am concerned about people judging me                     | I am concerned about people judging me.                     |
| 33            | I have difficulty concentrating                            | I have difficulty concentrating.                            |
| 34            |                                                            | I am concerned about my weight change.                      |
| <b>PART B</b> |                                                            |                                                             |
| 1             | I feel unwell                                              | I feel unwell.                                              |
| 2             | I feel tired                                               | I feel tired.                                               |
| 3             | I have difficulty breathing                                | I have difficulty breathing.                                |
| 4             | I have problem with my energy level                        | I have problems with my energy level.                       |
| 5             | I have back pain                                           | I have back pain.                                           |
| 6             | My weight has changed                                      | <i>Item moved to PART A</i>                                 |
| 7             | I have nausea                                              | I have nausea.                                              |
| 8             | I have body pain                                           | I have body pain.                                           |
| 9             | I have diarrhea                                            | I have diarrhea.                                            |
| 10            | I have hair loss                                           | I have hair loss.                                           |
| 11            | I have fever                                               | I have/had fever.                                           |
| 12            | I have night sweats                                        | I have night sweats.                                        |
| 13            | I have cough                                               | I have/had a cough.                                         |
| 14            | I have chest pain                                          | I have/had chest pain.                                      |
| 15            | I have lumps                                               | I have lumps.                                               |
| 16            | I have problems with my appetite                           | I have problems with my appetite.                           |
| 17            | I have stomach-ache                                        | I have stomach ache.                                        |
| 18            | I have headache                                            | I have headaches.                                           |
| 19            | I have skin problems (e.g. itching, bruises, rashes, etc.) | I have skin problems (e.g. itching, bruises, rashes, etc.). |
| 20            | I have constipation                                        | I have constipation.                                        |
| 21            | I have fatigue                                             | I have fatigue.                                             |

|    |                                                     |                                                      |
|----|-----------------------------------------------------|------------------------------------------------------|
| 22 | I have infections (e.g. chest, lung, urinary, etc.) | I have infections (e.g. chest, lung, urinary, etc.). |
| 23 | I have vomiting                                     | I have experienced vomiting.                         |
| 24 | I have problems with my bowel.                      | I have bowel problems.                               |
| 25 | I have problems with my taste                       | I have problem with my sense of taste.               |
